# Supplementary material for: Restored glial glutamate transporter EAAT2 function as a potential therapeutic approach for Alzheimer’s disease
Source: PubMed Central journal article supplement — J Exp Med. 2015 Mar 9;212(3):319–32. doi: 10.1084/jem.20140413 (PMC4354363; doi:10.1084/jem.20140413), 2015-03-09
Supplement: supp_jem.20140413_JEM_20140413_sm.pdf [file supp_jem.20140413_JEM_20140413_sm.pdf]

## SUPPLEMENTAL MATERIAL

Takahashi et al., <http://www.jem.org/cgi/content/full/jem.20140413/DC1>**Table S1.** Glutamate uptake raw data

| Pup          | Total [ <sup>3</sup> H]glutamate uptake |                    | DHK-sensitive [ <sup>3</sup> H]glutamate uptake |                    | Percent inhibition of total glutamate uptake by DHK |            |
|--------------|-----------------------------------------|--------------------|-------------------------------------------------|--------------------|-----------------------------------------------------|------------|
|              | -Aβ                                     | +Aβ                | -Aβ                                             | +Aβ                | -Aβ                                                 | +Aβ        |
|              | <i>fmol/mg/min</i>                      | <i>fmol/mg/min</i> | <i>fmol/mg/min</i>                              | <i>fmol/mg/min</i> | %                                                   | %          |
| WT pup #1    | 159.95 ± 7.38                           | 175.91 ± 4.43      | 37.97 ± 5.21                                    | 11.37 ± 4.43       | 24.3 ± 2.5                                          | 6.4 ± 2.4  |
| WT pup #2    | 236.43 ± 3.66                           | 216.78 ± 3.02      | 35.53 ± 0.42                                    | 7.19 ± 3.02        | 15.2 ± 0.2                                          | 3.3 ± 1.3  |
| WT pup #3    | 185.40 ± 4.78                           | 155.65 ± 2.56      | 37.20 ± 3.38                                    | 8.07 ± 2.56        | 20.3 ± 1.5                                          | 5.2 ± 1.6  |
| WT pup #4    | 129.51 ± 2.16                           | 98.09 ± 0.62       | 27.65 ± 2.16                                    | 15.96 ± 0.62       | 21.3 ± 1.3                                          | 16.3 ± 0.5 |
| WT pup #5    | 168.05 ± 3.25                           | 135.89 ± 4.42      | 30.68 ± 1.43                                    | 20.46 ± 4.42       | 18.5 ± 0.7                                          | 15.0 ± 2.8 |
| EAAT2 pup #1 | 279.30 ± 8.72                           | 280.50 ± 2.19      | 43.38 ± 6.17                                    | 35.99 ± 2.19       | 15.3 ± 1.8                                          | 12.8 ± 0.7 |
| EAAT2 pup #2 | 262.89 ± 8.49                           | 263.72 ± 5.20      | 50.78 ± 3.04                                    | 39.30 ± 5.20       | 19.0 ± 0.9                                          | 14.9 ± 1.7 |
| EAAT2 pup #3 | 257.16 ± 1.77                           | 254.78 ± 12.73     | 32.24 ± 1.77                                    | 30.92 ± 12.73      | 12.5 ± 0.6                                          | 12.0 ± 4.3 |
| EAAT2 pup #4 | 230.42 ± 4.44                           | 232.95 ± 1.94      | 44.97 ± 4.44                                    | 36.86 ± 1.94       | 19.5 ± 1.5                                          | 15.8 ± 0.7 |

For total [<sup>3</sup>H]glutamate uptake and DHK-sensitive [<sup>3</sup>H]glutamate uptake, the values are the mean ± SD of triplicate.
